# Supplementary material for: Rural patient and provider perceptions of telehealth implemented during the COVID-19 pandemic
Source: PubMed Central journal article supplement (PMC10496200; doi:10.1186/s12913-023-09994-4), 2023-09-12
Supplement: 12913_2023_9994_MOESM2_ESM.pdf [file 12913_2023_9994_MOESM2_ESM.pdf]

Telehealth Research Project

Research Question: Do virtual visits add value and improve quality of care?

1. Have you used a telehealth platform (e.g., Care Convene, Cerner Community Works, Zoom for Healthcare, Doximity, Doxy.me, etc.) to conduct virtual patient care in the past 3 months?

Yes

No

Telehealth Research Project

2. For each of the visit types below, select on a Likert Scale which best applies: Telehealth works well for a \_\_\_\_\_ type of visit.

|                           | Strongly Disagree     | Disagree              | Neutral               | Agree                 | Strongly Agree        | N/A                   |
|---------------------------|-----------------------|-----------------------|-----------------------|-----------------------|-----------------------|-----------------------|
| Diabetes                  | <input type="radio"/> | <input type="radio"/> | <input type="radio"/> | <input type="radio"/> | <input type="radio"/> | <input type="radio"/> |
| Anxiety/Depression        | <input type="radio"/> | <input type="radio"/> | <input type="radio"/> | <input type="radio"/> | <input type="radio"/> | <input type="radio"/> |
| Other Mental Health       | <input type="radio"/> | <input type="radio"/> | <input type="radio"/> | <input type="radio"/> | <input type="radio"/> | <input type="radio"/> |
| Hypertension              | <input type="radio"/> | <input type="radio"/> | <input type="radio"/> | <input type="radio"/> | <input type="radio"/> | <input type="radio"/> |
| CAD                       | <input type="radio"/> | <input type="radio"/> | <input type="radio"/> | <input type="radio"/> | <input type="radio"/> | <input type="radio"/> |
| Asthma/COPD               | <input type="radio"/> | <input type="radio"/> | <input type="radio"/> | <input type="radio"/> | <input type="radio"/> | <input type="radio"/> |
| Medicare Wellness         | <input type="radio"/> | <input type="radio"/> | <input type="radio"/> | <input type="radio"/> | <input type="radio"/> | <input type="radio"/> |
| Skin Lesion/Rash          | <input type="radio"/> | <input type="radio"/> | <input type="radio"/> | <input type="radio"/> | <input type="radio"/> | <input type="radio"/> |
| Acute care (URI/UTI/etc.) | <input type="radio"/> | <input type="radio"/> | <input type="radio"/> | <input type="radio"/> | <input type="radio"/> | <input type="radio"/> |
| Hospital/ED follow-up     | <input type="radio"/> | <input type="radio"/> | <input type="radio"/> | <input type="radio"/> | <input type="radio"/> | <input type="radio"/> |
| COVID-19 Assessment       | <input type="radio"/> | <input type="radio"/> | <input type="radio"/> | <input type="radio"/> | <input type="radio"/> | <input type="radio"/> |

3. Telehealth visits add value to my practice.

| Strongly Disagree     | Disagree              | Neutral               | Agree                 | Strongly Agree        | N/A                   |
|-----------------------|-----------------------|-----------------------|-----------------------|-----------------------|-----------------------|
| <input type="radio"/> | <input type="radio"/> | <input type="radio"/> | <input type="radio"/> | <input type="radio"/> | <input type="radio"/> |

4. A telehealth visit is more efficient than an in-person visit.

| Strongly Disagree     | Disagree              | Neutral               | Agree                 | Strongly Agree        | N/A                   |
|-----------------------|-----------------------|-----------------------|-----------------------|-----------------------|-----------------------|
| <input type="radio"/> | <input type="radio"/> | <input type="radio"/> | <input type="radio"/> | <input type="radio"/> | <input type="radio"/> |

5. Being able to do a limited physical exam during a video visit adds value over a telephone visit alone.

| Strongly Disagree     | Disagree              | Neutral               | Agree                 | Strongly Agree        | N/A                   |
|-----------------------|-----------------------|-----------------------|-----------------------|-----------------------|-----------------------|
| <input type="radio"/> | <input type="radio"/> | <input type="radio"/> | <input type="radio"/> | <input type="radio"/> | <input type="radio"/> |

6. What are your biggest challenges, if any, that you face regarding telehealth visits? Select all that apply.

- Lack of reimbursement
- Licensure
- Technology challenges for the patient
- Low patient engagement
- Lack of implementation support
- Technology challenges for the provider/practice
- No challenges
- Other (please specify)

7. Telehealth has impacted my practice by improving \_\_\_\_\_.

|                                   | Strongly Disagree     | Disagree              | Neutral               | Agree                 | Strongly Agree        | N/A                   |
|-----------------------------------|-----------------------|-----------------------|-----------------------|-----------------------|-----------------------|-----------------------|
| the health of my patients         | <input type="radio"/> | <input type="radio"/> | <input type="radio"/> | <input type="radio"/> | <input type="radio"/> | <input type="radio"/> |
| the safety of my patients         | <input type="radio"/> | <input type="radio"/> | <input type="radio"/> | <input type="radio"/> | <input type="radio"/> | <input type="radio"/> |
| timeliness of care of my patients | <input type="radio"/> | <input type="radio"/> | <input type="radio"/> | <input type="radio"/> | <input type="radio"/> | <input type="radio"/> |
| patient and family centered care  | <input type="radio"/> | <input type="radio"/> | <input type="radio"/> | <input type="radio"/> | <input type="radio"/> | <input type="radio"/> |
| access to care                    | <input type="radio"/> | <input type="radio"/> | <input type="radio"/> | <input type="radio"/> | <input type="radio"/> | <input type="radio"/> |
| health of my patients             | <input type="radio"/> | <input type="radio"/> | <input type="radio"/> | <input type="radio"/> | <input type="radio"/> | <input type="radio"/> |
| no show rate                      | <input type="radio"/> | <input type="radio"/> | <input type="radio"/> | <input type="radio"/> | <input type="radio"/> | <input type="radio"/> |
| financial health of my practice   | <input type="radio"/> | <input type="radio"/> | <input type="radio"/> | <input type="radio"/> | <input type="radio"/> | <input type="radio"/> |
| satisfaction of my job            | <input type="radio"/> | <input type="radio"/> | <input type="radio"/> | <input type="radio"/> | <input type="radio"/> | <input type="radio"/> |

8. In the past 3 months, have you experienced any technical issues when using telehealth technology?

- Yes
- No

## Telehealth Research Project

9. What issues have you encountered with telehealth visits? Check all that apply:

- Video not working at all
- Video stopped working in the middle of the visit
- Video working but inadequate for what I needed to look at
- Audio stopped working in the middle of the visit
- Audio working but inadequate for what I needed to hear
- Patient had problems connecting to the service
- I had problems connecting to the service
- Telehealth technology failed
- Other (please specify)

10. What did you do to remediate? Check all that apply:

- Resorted to a telephone call
- Asked the patient to reschedule for video visit
- Used another video visit technology
- Asked the patient to reschedule for in-person visit
- Other (please specify)

## Telehealth Research Project

11. Moving forward, what percentage of your visits do you think will be virtual?

- 0
- 1-10%
- 11-20%
- 21-40%
- 41-60%
- >60

12. Do you practice at a Munson Healthcare owned practice?

- Yes
- No

13. Age Range of Provider

- 25-30
- 31-40
- 41-50
- 51-65
- >65

14. How long have you been practicing medicine?

- Resident
- <5 years
- 5-10 years
- 11-20 years
- 21-30 years
- >30 years

Telehealth Research Project

Thank you for taking the time to complete this survey.
